# Supplementary material for: Fine Needle-Diathermy Regresses Pathological Corneal (Lymph)Angiogenesis and Promotes High-Risk Corneal Transplant Survival
Source: PubMed Central journal article supplement (PMC5890271; doi:10.1038/s41598-018-24037-3), 2018-04-09
Supplement: 41598_2018_24037_MOESM1_ESM.pdf [file 41598_2018_24037_MOESM1_ESM.pdf]

# FINE NEEDLE-DIATHERMY REGRESSES PATHOLOGICAL CORNEAL (LYMPH)ANGIOGENESIS AND PROMOTES HIGH-RISK CORNEAL TRANSPLANT SURVIVAL

Viet Nhat Hung Le<sup>1,2</sup>, Ann-Charlott Schneider<sup>1</sup>, Rebecca Scholz<sup>1</sup>, Felix Bock<sup>1,3,\*</sup> and Claus Cursiefen<sup>1,3</sup>

1 Department of Ophthalmology, University Hospital of Cologne, Germany

2 Department of Ophthalmology, Hue University of Medicine and Pharmacy, Vietnam

3 Center for Molecular Medicine Cologne (CMMC), University of Cologne, Germany

\*Correspondence: Felix Bock, PhD, Department of Ophthalmology, University of Cologne, Kerpener Strasse 62, 50924 Cologne, Germany; phone: +49 221 478 -97789; fax: -5094; felix.bock@uk-koeln.de; www.augenklinik.uk-koeln.de

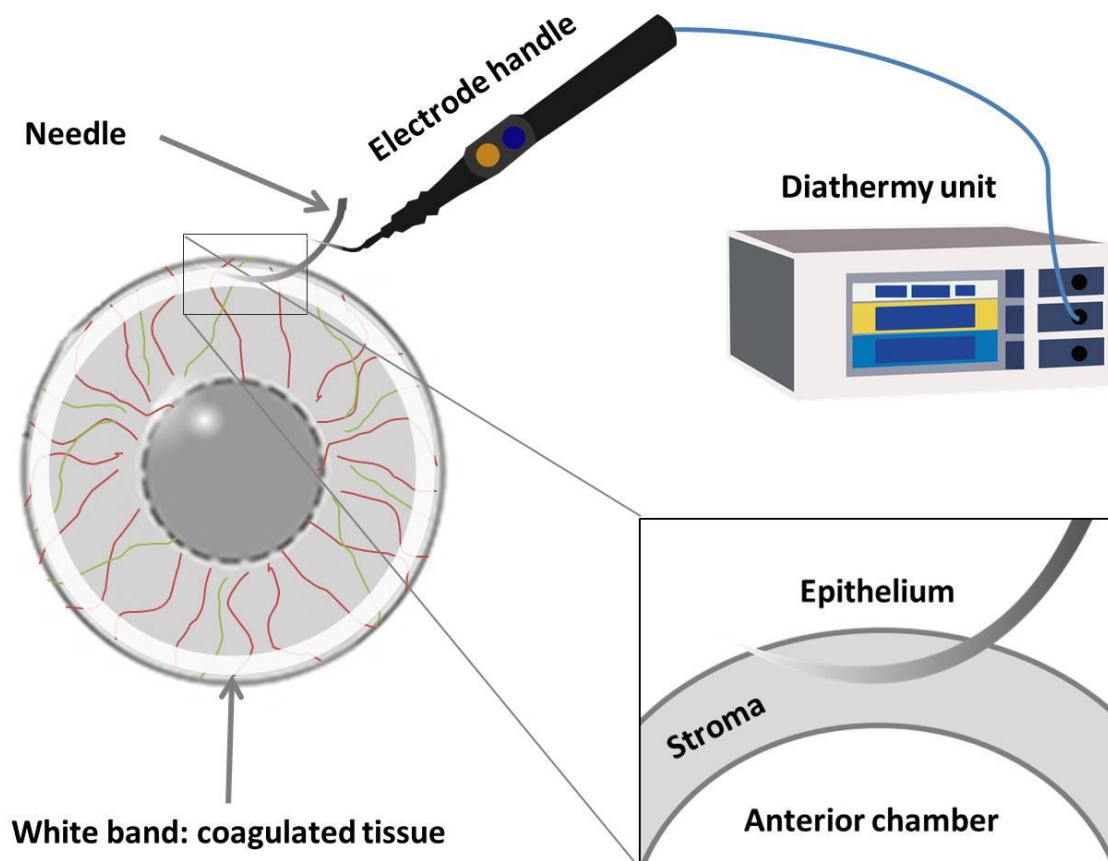

**Supplementary figure:** A circular fine-needle cautery approach was used in a 360 degree fashion to induce a small band of coagulated stromal tissue to regress both pathologic corneal blood as well as lymphatic vessels.
